# Supplementary material for: The natural compound chebulagic acid inhibits vascular endothelial growth factor A mediated regulation of endothelial cell functions
Source: PubMed Central journal article supplement (PMC4819393; doi:10.1038/srep09642), 2015-04-10
Supplement: srep09642-s1.pdf [file srep09642-s1.pdf]

## The natural compound chebulagic acid inhibits vascular endothelial growth factor-A mediated regulation of endothelial cell functions

Kai Lu<sup>1</sup> & Sujit Basu<sup>1, 2\*</sup>

<sup>1</sup>Department of Pathology and <sup>2</sup>Division of Medical Oncology, Department of Internal Medicine, Ohio State University, Columbus, Ohio 43210, United States of America

\*Correspondence and requests for materials should be addressed to Sujit Basu (sujit.basu@osumc.edu)

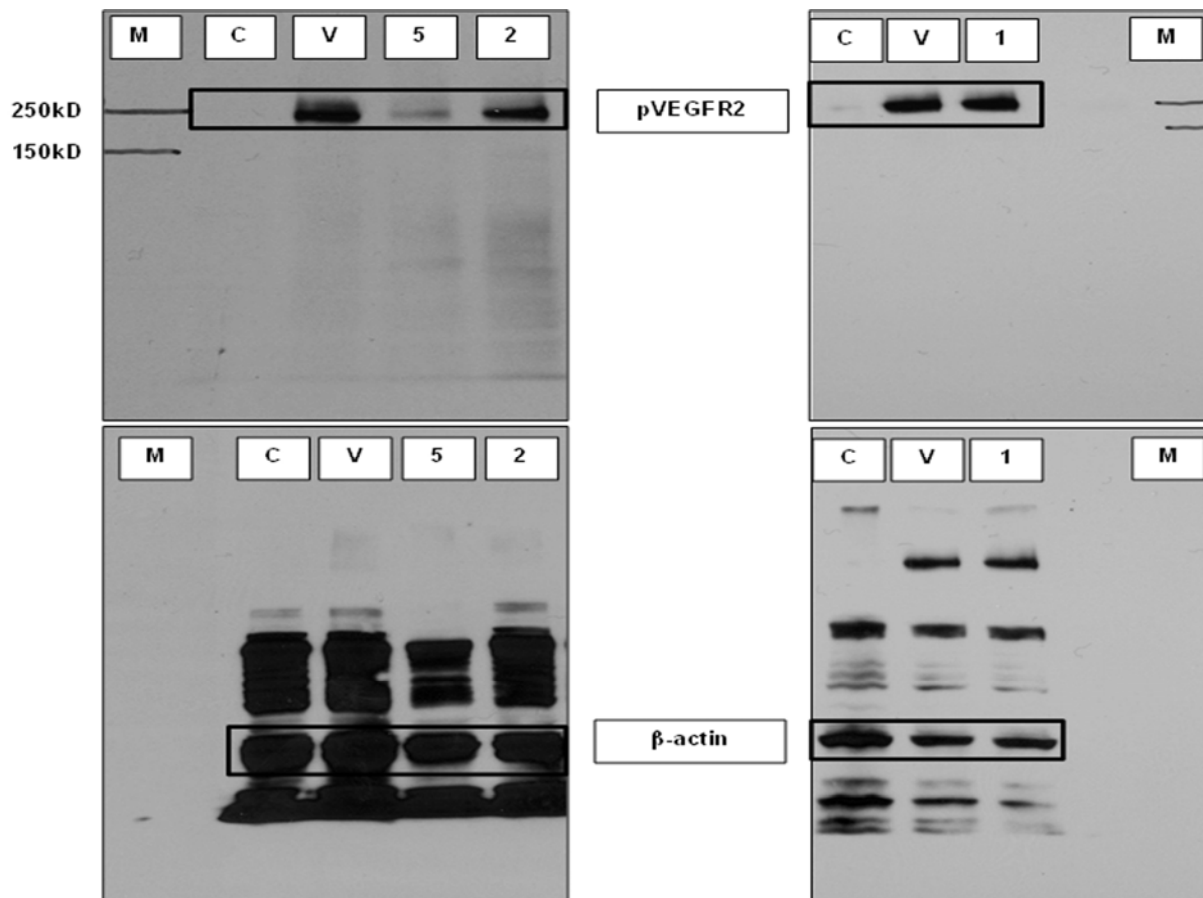

**Figure S1. Full length blots of Figure 7.** M: marker; C: untreated control; V: 20 ng/ml of VEGFA treated; 1: treated with 20 ng/ml of VEGFA + 1 $\mu$ M chebulagic acid; 2: treated with 20 ng/ml VEGFA + 2 $\mu$ M chebulagic acid and 5: treated with 20 ng/ml of VEGFA + 5 $\mu$ M chebulagic acid.
